# Supplementary material for: Mapping the Binding Interface of PET Tracer Molecules and Alzheimer Disease Aβ Fibrils by Using MAS Solid‐State NMR Spectroscopy
Source: PubMed Central journal article supplement (PMC7496087; doi:10.1002/cbic.202000143), 2020-05-19
Supplement: CBIC-21-2495-s001.pdf [file CBIC-21-2495-s001.pdf]

# ChemBioChem

## Supporting Information

### **Mapping the Binding Interface of PET Tracer Molecules and Alzheimer Disease A $\beta$ Fibrils by Using MAS Solid-State NMR Spectroscopy**

Zheng Niu, Riddhiman Sarkar, Michaela Aichler, Hans-Jürgen Wester, Behrooz Hooshyar Yousefi<sup>+,\*</sup> and Bernd Reif<sup>+,\*</sup> © 2020 The Authors. Published by Wiley-VCH Verlag GmbH & Co. KGaA. This is an open access article under the terms of the Creative Commons Attribution License, which permits use, distribution and reproduction in any medium, provided the original work is properly cited. This article is part of a Special Collection on the occasion of Horst Kessler's 80th birthday. To view the complete collection, visit our

## Supporting Information

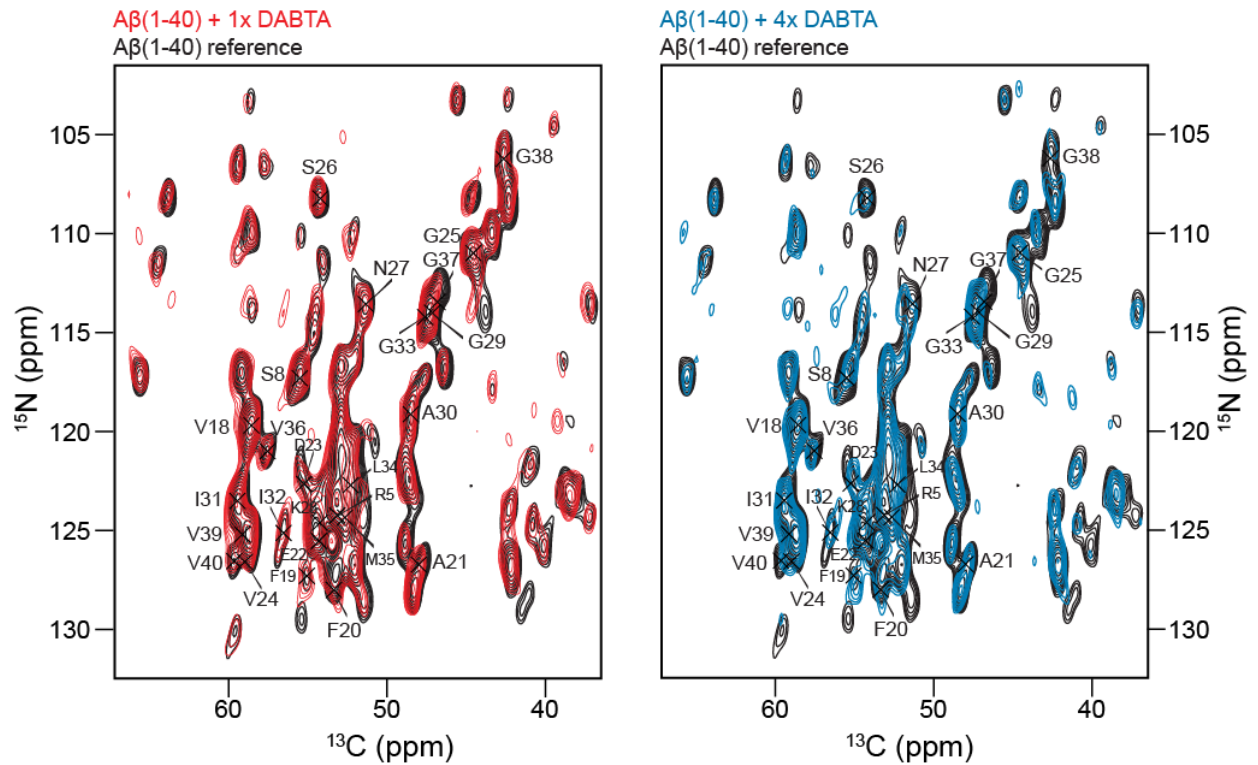

**Supporting figure 1.** Superposition of 2D NCACX spectra recorded for Aβ(1-40) reference fibrils (black) and Aβ(1-40) fibrils titrated with an equimolar amount of DABTA (red) and with a 4-fold molar excess of DABTA (right, blue). The experiments were carried out using a Bruker Avance III 750 MHz spectrometer. The MAS rotation frequency has been adjusted to 10 kHz. The PSD mixing time was set to 50 ms. The effective sample temperature was 10 °C.



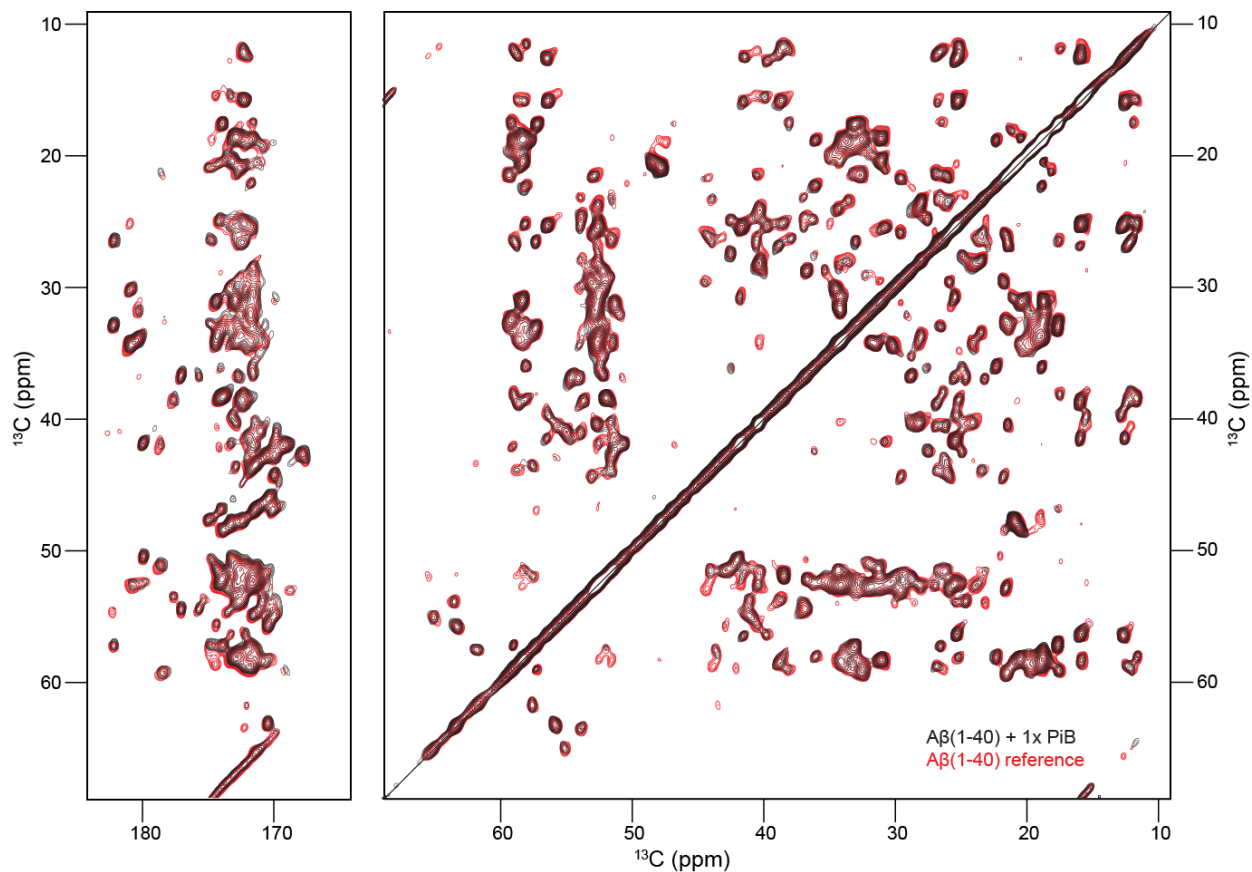

**Supporting Figure 3.** Superposition of 2D  $^{13}\text{C}$ ,  $^{13}\text{C}$  PDSD spectra of  $^{13}\text{C}$ ,  $^{15}\text{N}$ -labeled  $\text{A}\beta(1-40)$  reference fibrils (black) and  $\text{A}\beta(1-40)$  fibrils in the presence of an equimolar amount of PiB (red).  $\text{A}\beta(1-40)$  fibrils were produced without seeding. As a consequence, two sets of resonances are observed in the spectra. For none of the two polymorphs, chemical shift changes can be observed upon addition of PiB. The experiments were acquired using a Bruker Avance III operating at a proton Larmor frequency of 750 MHz spectrometer. The MAS rotation frequency was adjusted to 10 kHz. The PDSD mixing time was set to 50 ms.



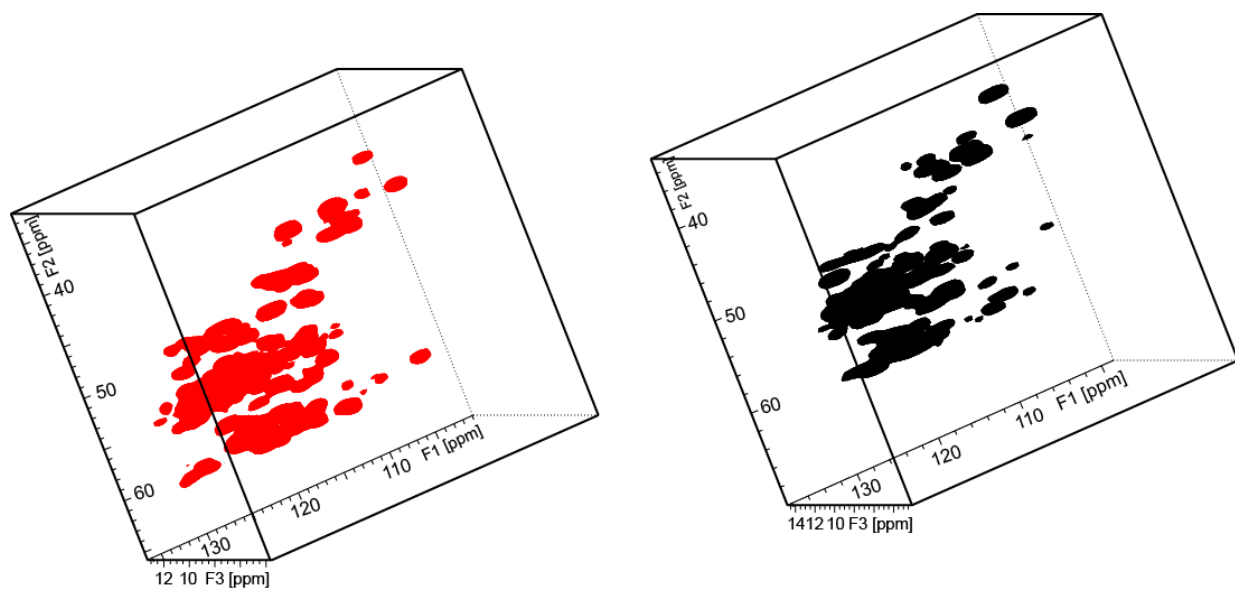

**Supporting figure 5.** 3D cube of hCANH experiments of A $\beta$ (1-40) reference fibrils (left) and A $\beta$ (1-40) fibrils in the presence of equimolar PiB (right).

**Table S1.** Chemical shift assignments for protonated A $\beta$ (1-40) fibrils.

| aa  | N      | N $\zeta$ | CO     | C $\alpha$ | C $\beta$ | C $\gamma$     | C $\delta$ | C $\epsilon$ | C $\zeta$ |
|-----|--------|-----------|--------|------------|-----------|----------------|------------|--------------|-----------|
| R5  | 124.24 | -         | -      | 53.14      | 31.76     | 26.10          | 42.08      | -            | 158.13    |
| D7  | -      | -         | 174.49 | 51.87      | 42.00     | 179.10         | -          | -            | -         |
| S8  | 117.31 | -         | 172.03 | 55.50      | 65.61     | -              | -          | -            | -         |
| Q15 | -      | -         | 170.13 | 53.09      | 31.94     | 34.84          | 180.76     | -            | -         |
| V18 | 119.74 | -         | 172.38 | 58.81      | 34.46     | 19.20<br>20.85 | -          | -            | -         |
| F19 | 127.31 | -         | 170.64 | 55.10      | 42.19     | -              | -          | -            | -         |
| F20 | 128.01 | -         | 171.53 | 53.35      | 40.90     | -              | -          | -            | -         |
| A21 | 126.72 | -         | 173.78 | 47.97      | 19.37     | -              | -          | -            | -         |
| E22 | 125.53 | -         | 173.07 | 54.29      | 30.41     | 34.73          | 181.33     | -            | -         |
| D23 | 122.65 | -         | 173.54 | 55.24      | 37.89     | 182.71         | -          | -            | -         |
| V24 | 126.58 | -         | 173.15 | 59.00      | 31.38     | 18.71<br>21.39 | -          | -            | -         |
| G25 | 111.00 | -         | 170.44 | 44.72      | -         | -              | -          | -            | -         |
| S26 | 108.27 | -         | 172.59 | 54.16      | 64.05     | -              | -          | -            | -         |
| N27 | 113.63 | -         | 172.63 | 51.21      | 37.18     | 175.10         | -          | -            | -         |
| K28 | 124.61 | 32.85     | 173.46 | 54.26      | 28.60     | 24.71          | -          | 40.78        | -         |
| G29 | 114.00 | -         | 171.63 | 47.20      | -         | -              | -          | -            | -         |
| A30 | 119.12 | -         | 173.72 | 48.50      | 21.08     | -              | -          | -            | -         |
| I31 | 123.52 | -         | 172.79 | 59.46      | 38.42     | 26.71<br>17.87 | 12.45      | -            | -         |
| I32 | 125.07 | -         | 174.70 | 56.52      | 40.98     | 25.69<br>16.16 | 12.45      | -            | -         |
| G33 | 114.22 | -         | 170.51 | 47.57      | -         | -              | -          | -            | -         |
| L34 | 122.70 | -         | 171.71 | 52.30      | 44.21     | 27.02          | 23.89      | -            | -         |
| M35 | 124.35 | -         | 172.13 | 52.67      | 37.16     | 29.16          | -          | -            | -         |
| V36 | 121.07 | -         | 174.28 | 57.65      | 33.48     | 17.98          | -          | -            | -         |
| G37 | 113.46 | -         | 171.11 | 46.81      | -         | -              | -          | -            | -         |
| G38 | 106.22 | -         | 169.84 | 42.63      | -         | -              | -          | -            | -         |
| V39 | 125.20 | -         | 172.82 | 59.17      | 33.20     | 20.00          | -          | -            | -         |
| V40 | 126.60 | -         | 180.03 | 59.76      | 32.89     | 19.19<br>21.91 | -          | -            | -         |



**Table S2.** Chemical shift assignments for deuterated A $\beta$ (1-40) reference fibrils, and A $\beta$ (1-40) fibrils in presence of  $^{13}\text{C}$ -Me-PiB.

| aa  | H <sup>N</sup> | N                | C $\alpha$     | C $\beta$  | CO               |
|-----|----------------|------------------|----------------|------------|------------------|
| A21 | 8.50<br>8.47   | 121.96<br>121.81 | 47.39<br>47.38 | 18.74<br>- | 170.02<br>-      |
| E22 | 8.30<br>-      | 119.17<br>-      | 52.02<br>-     | -<br>-     | 171.96<br>-      |
| D23 | 9.86<br>-      | 126.64<br>-      | 51.63<br>-     | 35.16<br>- | 173.22<br>-      |
| V24 | 9.27<br>-      | 123.63<br>-      | 51.47<br>54.58 | -<br>-     | 171.85<br>171.10 |
| G25 | 8.52<br>8.11   | 111.13<br>112.43 | 43.15<br>42.11 | -<br>-     | 173.00<br>173.45 |
| S26 | 8.21<br>9.08   | 109.70<br>118.53 | 56.76<br>54.59 | 58.07<br>- | 170.56<br>171.80 |
| N27 | 9.01<br>8.21   | 118.49<br>115.37 | 51.94<br>55.13 | -<br>-     | 170.49<br>172.85 |
| K28 | 8.83<br>9.10   | 125.63<br>128.74 | 53.12<br>52.65 | 30.69<br>- | 172.44<br>171.61 |
| G29 | 8.73<br>8.65   | 107.06<br>106.48 | 38.26<br>38.17 | -<br>-     | 172.75<br>171.44 |
| A30 | 7.38<br>7.33   | 123.91<br>123.25 | 49.67<br>49.68 | 20.48<br>- | 172.48<br>171.67 |
| I31 | 9.46<br>9.39   | 121.95<br>121.47 | 58.44<br>58.33 | 36.09<br>- | 171.29<br>-      |
| I32 | 9.18<br>9.11   | 125.20<br>125.58 | 58.21<br>56.53 | 36.58<br>- | 171.79<br>172.76 |
| G33 | 8.07<br>8.73   | 112.71<br>116.61 | 42.42<br>42.44 | -<br>-     | 177.20<br>166.93 |
| L34 | 8.58<br>8.61   | 128.95<br>128.57 | 50.72<br>50.73 | 43.41<br>- | 171.91<br>171.25 |
| M35 | 9.45<br>9.30   | 125.90<br>125.59 | 50.73<br>50.75 | 32.84<br>- | 172.19<br>171.86 |
| V36 | 8.57<br>8.56   | 127.19<br>126.97 | 58.05<br>58.09 | 29.73<br>- | 175.48<br>173.73 |
| G37 | 9.02<br>8.93   | 111.34<br>110.17 | 43.12<br>43.29 | -<br>-     | 174.63<br>169.28 |
| G38 | 7.88<br>7.81   | 106.05<br>105.20 | 41.22<br>41.14 | -<br>-     | 175.43<br>167.79 |
| V39 | 8.76<br>8.69   | 123.19<br>122.77 | 58.21<br>58.07 | 31.62<br>- | 174.04<br>-      |
| V40 | 9.29<br>-      | 132.34<br>-      | 58.40<br>-     | -<br>-     | -<br>-           |

## References

- [1] E. Barbet-Massin, A. J. Pell, J. S. Retel, L. B. Andreas, K. Jaudzems, W. T. Franks, A. J. Nieuwkoop, M. Hiller, V. Higman, P. Guerry, A. Bertarello, M. J. Knight, M. Felletti, T. Le Marchand, S. Kotelovica, I. Akopjana, K. Tars, M. Stoppini, V. Bellotti, M. Bolognesi, S. Ricagno, J. J. Chou, R. G. Griffin, H. Oschkinat, A. Lesage, L. Emsley, T. Herrmann, G. Pintacuda, *J. Am. Chem. Soc.* 2014, 136, 12489-12497.
